# Supplementary material for: IQD1 Involvement in Hormonal Signaling and General Defense Responses Against Botrytis cinerea
Source: Front Plant Sci. 2022 Apr 26;13:845140. doi: 10.3389/fpls.2022.845140 (PMC9087847; doi:10.3389/fpls.2022.845140)
Supplement: Supplementary file 7 [file Data_Sheet_6.xlsx]

## Sheet: iqd1-1+Bc up
466 upregulated genes after infecting iqd1-1 as compared to infecting WT, FC>=4
#	Gene ID	Description	Log2(FC)	FC
1	BC1G_08989	beta-d-glucan cellobiohydrolase c	11.9632	3992.87
2	BC1G_08363		11.5667	3033.39
3	BC1G_10880	concanavalin a-like lectins glucanase	11.2812	2488.82
4	BC1G_06035	glycoside hydrolase family 7 protein	10.4611	1409.63
5	BC1G_13645	glycoside hydrolase family 11 protein	9.05999	533.739
6	BC1G_02036	glycoside hydrolase family 5 protein	9.05575	532.174
7	BC1G_08990	glycoside hydrolase family 5 protein	7.78079	219.913
8	BC1G_15120		7.56523	189.391
9	BC1G_09210	endoglucanase 1	7.56315	189.119
10	BC1G_14164	beta-d-glucoside glucohydrolase	7.12816	139.891
11	BC1G_07822	glycoside hydrolase family 5 protein	7.12334	139.425
12	BC1G_11623	mfs sugar transporter	7.1221	139.304
13	BC1G_14374	lactose permease	7.06422	133.826
14	BC1G_02551	glycoside hydrolase family 45 protein	6.8039	111.732
15	BC1G_14375	lactose permease protein	6.69621	103.696
16	BC1G_03479	glycoside hydrolase family 5 protein	6.49185	90
17	BC1G_12189	hexose transporter protein	6.43122	86.2957
18	BC1G_13273	sugar transporter	6.31879	79.8261
19	BC1G_10717	general substrate transporter	6.26107	76.6957
20	BC1G_04691	beta-glucosidase a	6.09542	68.3762
21	BC1G_02545	glycoside hydrolase family 43 protein	6.09232	68.2292
22	BC1G_10358		6.0407	65.8312
23	BC1G_13274		5.95014	61.8261
24	BC1G_09000	pectate lyase b	5.94098	61.4348
25	BC1G_12511	mfs transporter	5.81629	56.3478
26	BC1G_02541	glycoside hydrolase family 61 protein	5.79204	55.4087
27	BC1G_07496	extracellular exo-	5.73618	53.3043
28	BC1G_10716		5.71245	52.4348
29	BC1G_15017		5.68073	51.2945
30	BC1G_11910	carbohydrate esterase family 8 protein	5.66873	50.8696
31	BC1G_11255	glycoside family 1	5.60056	48.5217
32	BC1G_12680	carbohydrate esterase family 16 protein	5.53713	46.4348
33	BC1G_04994	alpha-l-arabinofuranosidase b	5.49679	45.1542
34	BC1G_10098	metalloproteases catalytic	5.45246	43.788
35	BC1G_04653	short-chain dehydrogenase	5.43644	43.3043
36	BC1G_08362	carbohydrate esterase family 16 protein	5.41353	42.6221
37	BC1G_05534	nitrilase protein	5.38783	41.8696
38	BC1G_07637	extracellular protein	5.36061	41.087
39	BC1G_02144	alcohol oxidase	5.34163	40.5501
40	BC1G_10341	mannan endo- -beta-mannosidase	5.32402	40.058
41	BC1G_09083	mfs allantoate transporter	5.30933	39.6522
42	BC1G_00501	carboxylesterase protein	5.30933	39.6522
43	BC1G_13616	isocitrate lyase	5.30037	39.4066
44	BC1G_02361	major facilitator superfamily transporter protein	5.29022	39.1304
45	BC1G_01234	glycoside hydrolase family 28 protein	5.23133	37.5652
46	BC1G_12885	mfs transporter	5.08575	33.9596
47	BC1G_13938	glycoside hydrolase family 93 protein	5.08323	33.9003
48	BC1G_01778	endo- -beta-	5.0689	33.5652
49	BC1G_07461		4.9027	29.913
50	BC1G_08642		4.89429	29.7391
51	BC1G_00922		4.89429	29.7391
52	BC1G_05363		4.89429	29.7391
53	BC1G_10204	quinate permease	4.89429	29.7391
54	BC1G_09917	gdsl-like lipase acylhydrolase domain protein	4.85582	28.9565
55	BC1G_16209	arabinogalactan endo- -beta-galactosidase	4.82958	28.4348
56	BC1G_02154		4.78932	27.6522
57	BC1G_08372	glycoside hydrolase family 51 protein	4.76382	27.1677
58	BC1G_01172		4.76184	27.1304
59	BC1G_02731	glycoside hydrolase family 55 protein	4.7507	26.9217
60	BC1G_05538	glycoside hydrolase family 3 protein	4.74344	26.7866
61	BC1G_05489	mfs maltose	4.72392	26.4267
62	BC1G_13567	mandelate racemase muconate lactonizing enzyme domain-containing protein	4.71831	26.3241
63	BC1G_06005	glycoside hydrolase family 12 protein	4.69399	25.8841
64	BC1G_10322	arabinan endo- -alpha-l-arabinosidase a	4.63036	24.7673
65	BC1G_08801	six-hairpin glycosidase	4.58496	24
66	BC1G_07974	esterase lipase	4.57813	23.8866
67	BC1G_05891		4.57111	23.7706
68	BC1G_08314	cutinase	4.53163	23.129
69	BC1G_15201		4.48286	22.3602
70	BC1G_13153	glycoside hydrolase family 115 protein	4.46556	22.0936
71	BC1G_02740	glycoside hydrolase family 5 protein	4.4549	21.931
72	BC1G_06541		4.41895	21.3913
73	BC1G_00049	amidohydrolase family protein	4.38333	20.8696
74	BC1G_07408	endoglucanase family 5 glycoside hydrolase	4.3468	20.3478
75	BC1G_08658	metallocarboxypeptidase a	4.3468	20.3478
76	BC1G_07768	alpha beta-hydrolase	4.30646	19.7867
77	BC1G_12379	acetyl xylan esterase	4.29598	19.6435
78	BC1G_06369	cutinase	4.29342	19.6087
79	BC1G_09082	mfs allantoate transporter	4.26107	19.1739
80	BC1G_06666	glycoside hydrolase family 3 protein	4.23133	18.7826
81	BC1G_00576	endo- -beta-xylanase	4.23133	18.7826
82	BC1G_11925	alpha-l-rhamnosidase a	4.19656	18.3354
83	BC1G_10221	beta-glucosidase 1 precursor	4.18433	18.1806
84	BC1G_12186		4.16993	18
85	BC1G_09891	high-affinity glucose transporter	4.16993	18
86	BC1G_04093	glycoside family 35	4.15592	17.8261
87	BC1G_11254		4.10579	17.2174
88	BC1G_11205	mfs general substrate transporter	4.07263	16.8261
89	BC1G_05455	glycoside hydrolase family 18 protein	4.07263	16.8261
90	BC1G_00956	quinate transport protein	3.99686	15.9652
91	BC1G_00503	carboxylesterase protein	3.98265	15.8087
92	BC1G_14361		3.96829	15.6522
93	BC1G_03619	rhamnogalacturonase a	3.96829	15.6522
94	BC1G_00080	protein (sam-dependent methyltransferases) protein	3.94404	15.3913
95	BC1G_02034		3.93109	15.2538
96	BC1G_14115	mfs general substrate transporter	3.91938	15.1304
97	BC1G_14688	glycoside hydrolase family 61 protein	3.90814	15.013
98	BC1G_03041		3.88477	14.7717
99	BC1G_03572		3.86604	14.5812
100	BC1G_07821	alpha-galactosidase d	3.85352	14.4552
101	BC1G_10948		3.83016	14.2231
102	BC1G_11223		3.81629	14.087
103	BC1G_00238	sugar transporter	3.81629	14.087
104	BC1G_09826	glycoside hydrolase family 39 protein	3.7829	13.7647
105	BC1G_04630	sugar transporter	3.70196	13.0137
106	BC1G_02656	gdsl lipase acylhydrolase family protein	3.69201	12.9242
107	BC1G_10486	glutaminase protein	3.68589	12.8696
108	BC1G_05361	hydantoin utilization protein a protein	3.68589	12.8696
109	BC1G_05483	c6 transcription	3.64636	12.5217
110	BC1G_04996	het domain-containing protein	3.64636	12.5217
111	BC1G_12022	mfs monosaccharide	3.61738	12.2727
112	BC1G_10485	glutaminase-like protein	3.57236	11.8957
113	BC1G_03991	glycoside hydrolase family 53 protein	3.55965	11.7913
114	BC1G_09285		3.55325	11.7391
115	BC1G_04496	glycoside hydrolase family 31 protein	3.5325	11.5714
116	BC1G_02363	alpha-d-xyloside xylohydrolase	3.52901	11.5435
117	BC1G_01157		3.51785	11.4545
118	BC1G_12387		3.50696	11.3684
119	BC1G_06328	glycoside hydrolase family 78 protein	3.50032	11.3162
120	BC1G_08033	polygalacturonase partial	3.49203	11.2514
121	BC1G_08406		3.45372	10.9565
122	BC1G_04235		3.45372	10.9565
123	BC1G_10678	fad binding domain-containing protein	3.45372	10.9565
124	BC1G_01218	acid protease	3.45372	10.9565
125	BC1G_16017		3.45372	10.9565
126	BC1G_09427		3.45372	10.9565
127	BC1G_14883		3.45372	10.9565
128	BC1G_03873	sugar transporter stl1	3.45372	10.9565
129	BC1G_10220		3.45372	10.9565
130	BC1G_08022	alpha beta hydrolase fold protein	3.41895	10.6957
131	BC1G_10026	mfs sugar transporter	3.4119	10.6435
132	BC1G_03706	six-hairpin glycosidase	3.4119	10.6435
133	BC1G_05542		3.40506	10.5932
134	BC1G_02730	glycosyl hydrolase family 88	3.38084	10.4168
135	BC1G_03623	integral membrane protein	3.36257	10.2857
136	BC1G_02281	dihydrodipicolinate synthetase family protein	3.36257	10.2857
137	BC1G_15131		3.35531	10.2341
138	BC1G_15586		3.35418	10.2261
139	BC1G_00298	short chain	3.34951	10.193
140	BC1G_03858	glycosyl hydrolase family 35	3.33034	10.0584
141	BC1G_07412		3.32318	10.0087
142	BC1G_10205	mfs general substrate transporter	3.32318	10.0087
143	BC1G_01561		3.32318	10.0087
144	BC1G_02756	short-chain dehydrogenase reductase family 16c member 6	3.31474	9.95031
145	BC1G_12512	nrps-like enzyme	3.3115	9.92795
146	BC1G_03707	ascus development protein	3.29022	9.78261
147	BC1G_04515	cellulose-binding gdsl lipase	3.28823	9.76912
148	BC1G_08492		3.24462	9.47826
149	BC1G_10404		3.23133	9.3913
150	BC1G_06547		3.23133	9.3913
151	BC1G_04649		3.23133	9.3913
152	BC1G_08535	alcohol oxidase	3.23133	9.3913
153	BC1G_02037		3.23133	9.3913
154	BC1G_10073	glutathione s-transferase	3.23133	9.3913
155	BC1G_00955	4-coumarate- ligase	3.19738	9.1729
156	BC1G_02364	beta- protein	3.18774	9.1118
157	BC1G_11455		3.16993	9
158	BC1G_01160	glycoside hydrolase family 79 protein	3.15592	8.91304
159	BC1G_02336		3.14886	8.86957
160	BC1G_00882	covalently-linked cell wall protein	3.14886	8.86957
161	BC1G_09884	mfs transporter	3.14252	8.83063
162	BC1G_02886		3.13381	8.77749
163	BC1G_08333		3.13054	8.75761
164	BC1G_07507		3.13054	8.75761
165	BC1G_12023		3.13054	8.75761
166	BC1G_06588		3.13054	8.75761
167	BC1G_04233	aldose 1-epimerase	3.11306	8.65217
168	BC1G_07402	multidrug transporter	3.09888	8.56751
169	BC1G_03464	rhamnogalacturonase b	3.08694	8.49689
170	BC1G_01483	exo-beta- -glucanase	3.08694	8.49689
171	BC1G_02346	acetyl- synthetase-like protein	3.06957	8.39526
172	BC1G_02728	acetoacetate- ligase	3.0686	8.38957
173	BC1G_03859	glycoside hydrolase family 35 protein	3.04972	8.2805
174	BC1G_08355		3.03868	8.21739
175	BC1G_08346		3.03007	8.16848
176	BC1G_07345		3.00893	8.04969
177	BC1G_02972	4-hydroxyphenylpyruvate dioxygenase	3.008	8.04449
178	BC1G_07996	acetoin dehydrogenase (diacetyl reductase)	2.99835	7.99085
179	BC1G_12517	pectin lyase	2.99144	7.95269
180	BC1G_10771	sugar transporter protein	2.98699	7.92817
181	BC1G_01019	glycoside hydrolase family 92 protein	2.97523	7.8638
182	BC1G_09939		2.96829	7.82609
183	BC1G_03184		2.96829	7.82609
184	BC1G_15036		2.96829	7.82609
185	BC1G_09181		2.96829	7.82609
186	BC1G_01007	glycoside hydrolase family 61 protein	2.96829	7.82609
187	BC1G_01691		2.96829	7.82609
188	BC1G_06038		2.96829	7.82609
189	BC1G_14104		2.96829	7.82609
190	BC1G_05101		2.96829	7.82609
191	BC1G_02106	phosphoribosyl transferase domain protein	2.96829	7.82609
192	BC1G_02817		2.96829	7.82609
193	BC1G_03693		2.96829	7.82609
194	BC1G_05321	p-loop containing nucleoside triphosphate hydrolase	2.96829	7.82609
195	BC1G_05187	mfs transporter	2.96829	7.82609
196	BC1G_15779	sterigmatocystin 8-o-methyltransferase	2.96829	7.82609
197	BC1G_08071		2.96829	7.82609
198	BC1G_13174		2.96829	7.82609
199	BC1G_11744		2.96829	7.82609
200	BC1G_01341		2.96829	7.82609
201	BC1G_13882		2.96829	7.82609
202	BC1G_10715		2.96829	7.82609
203	BC1G_03482	ring finger protein	2.96829	7.82609
204	BC1G_03463	transcription factor cys6	2.96829	7.82609
205	BC1G_13566	short-chain dehydrogenase reductase sdr	2.96829	7.82609
206	BC1G_12965	protein kinase-like (pk-like)	2.96829	7.82609
207	BC1G_09736	aaa family atpase protein	2.96829	7.82609
208	BC1G_12515	dihydrodipicolinate synthetase family protein	2.94373	7.69396
209	BC1G_02973		2.94298	7.68998
210	BC1G_09151	2-methylcitrate synthase	2.93417	7.64314
211	BC1G_09986	acetyl- synthetase-like protein	2.92591	7.59954
212	BC1G_13905	alpha beta hydrolase fold	2.91938	7.56522
213	BC1G_01463	o-methyltransferase protein	2.90814	7.50652
214	BC1G_06008		2.90814	7.50652
215	BC1G_02883		2.90814	7.50652
216	BC1G_14463		2.90814	7.50652
217	BC1G_05866		2.90814	7.50652
218	BC1G_05640		2.90276	7.47854
219	BC1G_02884		2.89429	7.43478
220	BC1G_12561	quinate permease	2.88515	7.38783
221	BC1G_03902	nonspecific lipid-transfer protein	2.88211	7.37227
222	BC1G_03049	major facilitator superfamily transporter	2.87902	7.35652
223	BC1G_11810	mfs general substrate transporter	2.87343	7.32806
224	BC1G_01012	hydrophobin class ii protein	2.86876	7.30435
225	BC1G_13756	glycoside hydrolase family 16 protein	2.86876	7.30435
226	BC1G_09426	glycoside hydrolase family 2 protein	2.83798	7.1502
227	BC1G_05033		2.82923	7.10693
228	BC1G_13970	pectin lyase-like protein	2.82459	7.08413
229	BC1G_08683	plasma membrane proteolipid 3 protein	2.81629	7.04348
230	BC1G_01704	mfs sugar	2.81629	7.04348
231	BC1G_04108		2.81629	7.04348
232	BC1G_09209		2.81629	7.04348
233	BC1G_12854	metallo-hydrolase oxidoreductase	2.77495	6.84451
234	BC1G_07683	catabolic 3-dehydroquinase 2	2.76184	6.78261
235	BC1G_08184	carboxylesterase 2	2.76184	6.78261
236	BC1G_11257	mfs sugar transporter	2.76184	6.78261
237	BC1G_05544	cytochrome p450 family protein	2.75646	6.75736
238	BC1G_11403		2.75489	6.75
239	BC1G_07529	aba4 protein	2.73667	6.66528
240	BC1G_15584		2.73383	6.65217
241	BC1G_02701		2.73383	6.65217
242	BC1G_01152	glycoside hydrolase family 79 protein	2.72862	6.62822
243	BC1G_00003	carbohydrate esterase family 16 protein	2.72531	6.61304
244	BC1G_05368	cysteine dioxygenase	2.72318	6.60326
245	BC1G_01155	glycosyl hydrolase family 43 protein	2.71792	6.57922
246	BC1G_02164		2.68589	6.43478
247	BC1G_03979		2.66428	6.33913
248	BC1G_12513		2.66266	6.33202
249	BC1G_14988		2.65208	6.28571
250	BC1G_03907		2.64636	6.26087
251	BC1G_02807		2.64636	6.26087
252	BC1G_11890	glycoside hydrolase family 76 protein	2.64636	6.26087
253	BC1G_02091		2.64636	6.26087
254	BC1G_13328		2.64636	6.26087
255	BC1G_07339		2.64636	6.26087
256	BC1G_15572		2.64636	6.26087
257	BC1G_15429		2.64636	6.26087
258	BC1G_05298	flavin-nucleotide-binding protein	2.64636	6.26087
259	BC1G_09211		2.64636	6.26087
260	BC1G_08857	quercetin -dioxygenase	2.64636	6.26087
261	BC1G_09914	domain protein	2.64636	6.26087
262	BC1G_03555		2.64636	6.26087
263	BC1G_10873		2.64636	6.26087
264	BC1G_15398		2.64636	6.26087
265	BC1G_05971	zinc finger protein 470 protein	2.64636	6.26087
266	BC1G_05795		2.64636	6.26087
267	BC1G_15273	hydrophobin class i	2.64636	6.26087
268	BC1G_14224		2.64636	6.26087
269	BC1G_15937		2.64636	6.26087
270	BC1G_14687		2.64636	6.26087
271	BC1G_10029		2.64636	6.26087
272	BC1G_11919		2.64636	6.26087
273	BC1G_14101	peptidase m14	2.64636	6.26087
274	BC1G_11909	extracellular exo-polygalacturonase	2.64636	6.26087
275	BC1G_03136		2.64636	6.26087
276	BC1G_07794	fad nad -binding protein	2.64636	6.26087
277	BC1G_03721		2.64636	6.26087
278	BC1G_10511		2.64636	6.26087
279	BC1G_07755		2.64636	6.26087
280	BC1G_05262		2.64636	6.26087
281	BC1G_09207		2.64636	6.26087
282	BC1G_00204		2.64636	6.26087
283	BC1G_04990		2.64636	6.26087
284	BC1G_09795	dynamin family protein	2.64636	6.26087
285	BC1G_02462		2.64636	6.26087
286	BC1G_12826		2.64636	6.26087
287	BC1G_10417		2.64636	6.26087
288	BC1G_02050		2.64636	6.26087
289	BC1G_05084	mfs general substrate transporter	2.64636	6.26087
290	BC1G_13258	cytochrome p450	2.64636	6.26087
291	BC1G_04111		2.64636	6.26087
292	BC1G_02408		2.64636	6.26087
293	BC1G_01174		2.64636	6.26087
294	BC1G_14150	nacht domain protein	2.64636	6.26087
295	BC1G_00280	chlorogenic acid esterase precursor protein	2.64636	6.26087
296	BC1G_12298		2.64636	6.26087
297	BC1G_13351	glycoside hydrolase family 78 protein	2.64511	6.25543
298	BC1G_13975	peptidoglycan-binding lysin subgroup protein	2.64511	6.25543
299	BC1G_14506	amino acid permease	2.64511	6.25543
300	BC1G_10305	c2h2 transcription factor protein	2.64511	6.25543
301	BC1G_13451		2.64511	6.25543
302	BC1G_05872	dihydroxyhept-2-ene- -dioic acid aldolase	2.64511	6.25543
303	BC1G_09957		2.64511	6.25543
304	BC1G_13748	aquaporin-like protein	2.64511	6.25543
305	BC1G_08769		2.64181	6.24112
306	BC1G_04934		2.61411	6.12245
307	BC1G_12060	sugar transporter	2.58769	6.01134
308	BC1G_15682		2.58496	6
309	BC1G_08543	dihydrodipicolinate synthetase family protein	2.58204	5.98787
310	BC1G_08389	mfs general substrate transporter	2.58101	5.98357
311	BC1G_11081		2.58048	5.98137
312	BC1G_05864	maltose permease	2.57126	5.94329
313	BC1G_07534		2.55783	5.8882
314	BC1G_06110		2.55325	5.86957
315	BC1G_00531		2.54253	5.82609
316	BC1G_10217		2.52083	5.73913
317	BC1G_12185		2.52083	5.73913
318	BC1G_09283		2.52083	5.73913
319	BC1G_04704		2.52083	5.73913
320	BC1G_10877	glycoside hydrolase family 1 protein	2.51457	5.71429
321	BC1G_05567	mfs lactose	2.50434	5.67391
322	BC1G_14122	peroxisomal adenine nucleotide transporter 1	2.49596	5.64104
323	BC1G_00245	alpha- -mannosidase family protein	2.49436	5.63478
324	BC1G_09303	glycoside hydrolase family 78 partial sequence	2.45372	5.47826
325	BC1G_13746		2.45372	5.47826
326	BC1G_05240		2.45372	5.47826
327	BC1G_05903	zn2 cys6 dna-binding protein	2.45372	5.47826
328	BC1G_13609	predicted protein	2.45372	5.47826
329	BC1G_02059	d-3-phosphoglycerate dehydrogenase	2.45372	5.47826
330	BC1G_04118		2.45372	5.47826
331	BC1G_02409		2.45372	5.47826
332	BC1G_12478	glycoside hydrolase family 5 protein	2.44167	5.43271
333	BC1G_00185		2.44104	5.43035
334	BC1G_05297	phosphatidylserine decarboxylase	2.43063	5.3913
335	BC1G_10077		2.42742	5.37931
336	BC1G_03078	enoyl- hydratase	2.42339	5.36429
337	BC1G_05902		2.40898	5.31097
338	BC1G_10861		2.40125	5.28261
339	BC1G_07531	pisatin demethylase	2.3974	5.26854
340	BC1G_09522	hexose carrier protein	2.39336	5.25379
341	BC1G_01837	enoyl- hydratase isomerase family protein	2.38333	5.21739
342	BC1G_03073		2.38333	5.21739
343	BC1G_14415	carbohydrate esterase family 5 protein	2.38333	5.21739
344	BC1G_03469	indoleamine -dioxygenase	2.38333	5.21739
345	BC1G_05897		2.38055	5.20736
346	BC1G_08869	oxidoreductase domain containing protein	2.36257	5.14286
347	BC1G_00198	glycoside hydrolase family 125 protein	2.35908	5.13043
348	BC1G_06893	cytochrome p450	2.3468	5.08696
349	BC1G_12363		2.3468	5.08696
350	BC1G_04435	amp-binding enzyme	2.3468	5.08696
351	BC1G_14311		2.3468	5.08696
352	BC1G_05130	short chain dehydrogenase reductase family	2.34151	5.06832
353	BC1G_02560	cupin 2 domain-containing protein	2.34026	5.06394
354	BC1G_09280		2.33927	5.06048
355	BC1G_16413		2.33225	5.03592
356	BC1G_12892		2.32443	5.0087
357	BC1G_11580	duf636 domain-containing protein	2.32443	5.0087
358	BC1G_04656	mfs multidrug transporter	2.32443	5.0087
359	BC1G_03053		2.32318	5.00435
360	BC1G_01134		2.32318	5.00435
361	BC1G_00945	alpha-n-	2.32318	5.00435
362	BC1G_12961		2.32318	5.00435
363	BC1G_10534		2.32318	5.00435
364	BC1G_09006		2.32318	5.00435
365	BC1G_12487		2.32318	5.00435
366	BC1G_03801		2.32318	5.00435
367	BC1G_06501		2.32318	5.00435
368	BC1G_14563	microsomal epoxide hydrolase	2.32318	5.00435
369	BC1G_02875		2.32318	5.00435
370	BC1G_01005	glycosyltransferase family 1 protein	2.32318	5.00435
371	BC1G_06363		2.32318	5.00435
372	BC1G_10703		2.32318	5.00435
373	BC1G_02145		2.32318	5.00435
374	BC1G_03788		2.32318	5.00435
375	BC1G_14863		2.32318	5.00435
376	BC1G_12462	nad h-dependent d-xylose reductase xyl1	2.31389	4.97222
377	BC1G_09644	triacylglycerol lipase	2.30933	4.95652
378	BC1G_10329	carbohydrate-binding module family 20 protein	2.30933	4.95652
379	BC1G_05210		2.29406	4.90435
380	BC1G_10226		2.29022	4.8913
381	BC1G_03009	fad linked oxidase domain protein	2.28757	4.88233
382	BC1G_12514	aldehyde reductase 1	2.28379	4.86957
383	BC1G_05809	zn2 cys6 dna-binding protein	2.27863	4.85217
384	BC1G_05894		2.27675	4.84585
385	BC1G_03945	cytochrome p450 phenylacetate 2-hydroxylase	2.25642	4.77803
386	BC1G_04040	3-oxoacyl-(acyl-carrier-protein) reductase	2.24209	4.73083
387	BC1G_04088		2.2366	4.71285
388	BC1G_05806		2.23133	4.69565
389	BC1G_05370	alpha beta-hydrolase	2.23133	4.69565
390	BC1G_15866		2.23133	4.69565
391	BC1G_08569		2.23133	4.69565
392	BC1G_06352	mfs transporter	2.23133	4.69565
393	BC1G_00311	mynd finger family protein	2.23133	4.69565
394	BC1G_10791	metalloproteases catalytic	2.23133	4.69565
395	BC1G_09067		2.23133	4.69565
396	BC1G_16106		2.23133	4.69565
397	BC1G_00586	short chain dehydrogenase	2.23133	4.69565
398	BC1G_05673	lactose permease	2.23133	4.69565
399	BC1G_14337	mip family channel protein	2.23133	4.69565
400	BC1G_01472		2.23133	4.69565
401	BC1G_10332	c6 transcription	2.23133	4.69565
402	BC1G_10113		2.23133	4.69565
403	BC1G_01018		2.23133	4.69565
404	BC1G_05063		2.23133	4.69565
405	BC1G_12495		2.23133	4.69565
406	BC1G_10710		2.23133	4.69565
407	BC1G_04132		2.23133	4.69565
408	BC1G_03460	cytochrome p450 protein	2.23133	4.69565
409	BC1G_10423		2.22464	4.67395
410	BC1G_16330	nucleoside-diphosphate-sugar epimerase	2.20579	4.61327
411	BC1G_12855	alcohol zinc-	2.1989	4.5913
412	BC1G_08615		2.19417	4.57627
413	BC1G_03483	udp-glucose 4-epimerase	2.19331	4.57354
414	BC1G_05425	2-nitropropane dioxygenase	2.19136	4.56736
415	BC1G_16088		2.18842	4.55805
416	BC1G_03377	urea hydro-lyase cyanamide hydratase	2.1879	4.55643
417	BC1G_15221		2.18411	4.54447
418	BC1G_07110	glycoside hydrolase family 3 protein	2.17199	4.50645
419	BC1G_08442		2.17182	4.50593
420	BC1G_01749		2.16993	4.5
421	BC1G_00716		2.16893	4.49689
422	BC1G_09526	tartrate dehydrogenase	2.15894	4.46586
423	BC1G_00743		2.15142	4.44265
424	BC1G_06640	major facilitator superfamily transporter	2.14886	4.43478
425	BC1G_12762		2.14886	4.43478
426	BC1G_10231	glycoside hydrolase family 3 protein	2.14348	4.41827
427	BC1G_07868	mfs transporter	2.13822	4.40217
428	BC1G_04137	short-chain dehydrogenase	2.13595	4.39526
429	BC1G_15676	glycoside hydrolase family 3 domain protein	2.1343	4.39024
430	BC1G_01136		2.13179	4.38261
431	BC1G_08871	3-methylcrotonyl- carboxylase subunit alpha protein	2.12636	4.36613
432	BC1G_09670	glucose-methanol-choline oxidoreductase	2.1228	4.35539
433	BC1G_07160	pi-plc x domain-containing protein	2.11585	4.33445
434	BC1G_00050	salicylate hydroxylase	2.11585	4.33445
435	BC1G_02456	family a g protein-coupled receptor-like protein	2.11422	4.32957
436	BC1G_04926		2.10579	4.30435
437	BC1G_13810		2.10579	4.30435
438	BC1G_08870	3-methylcrotonyl- carboxylase subunit alpha	2.10341	4.29723
439	BC1G_00241		2.09888	4.28375
440	BC1G_00426		2.09806	4.28133
441	BC1G_08975	glycoside hydrolase family 95 protein	2.0963	4.27611
442	BC1G_04784	acetyl- synthetase	2.09382	4.26877
443	BC1G_10506		2.08694	4.24845
444	BC1G_14370		2.08694	4.24845
445	BC1G_12450		2.08246	4.23529
446	BC1G_14349	multicopper oxidase	2.06783	4.19255
447	BC1G_03276		2.06387	4.18106
448	BC1G_00895	chitin deacetylase	2.0614	4.17391
449	BC1G_11256	glycoside hydrolase family 95 protein	2.0614	4.17391
450	BC1G_15065		2.05906	4.16714
451	BC1G_09128		2.05426	4.1533
452	BC1G_04931	3-oxoacyl-(acyl-carrier-protein) reductase	2.05012	4.14141
453	BC1G_10210	nadp-dependent alcohol dehydrogenase 6	2.04059	4.11413
454	BC1G_00813	5-carboxymethyl-2-hydroxymuconate isomerase	2.03868	4.1087
455	BC1G_05348		2.03868	4.1087
456	BC1G_02619	carboxylase:pyruvate acetyl- propionyl- protein	2.03339	4.09365
457	BC1G_01505		2.02487	4.06957
458	BC1G_04076	succinate-semialdehyde dehydrogenase	2.02472	4.06913
459	BC1G_10025	alpha-n-arabinofuranosidase c	2.02238	4.06253
460	BC1G_04363		2.0156	4.04348
461	BC1G_05916	c6 finger domain protein	2.0156	4.04348
462	BC1G_11711	alpha beta hydrolase fold protein	2.0156	4.04348
463	BC1G_11019	fad dependent oxidoreductase	2.00893	4.02484
464	BC1G_12449	aromatic peroxygenase	2.00893	4.02484
465	BC1G_15972	reverse transcriptase domain protein	2.00893	4.02484
466	BC1G_12860	integral membrane protein	2.00392	4.01087

## Sheet: WT+Bc up
212 upregulated genes after infecting WT as compared to infecting iqd1-1, FC>=4
#	Gene ID	Description	Log2(FC)	FC
1	BC1G_07600	et-dependent rrna methyltransferase spb1	4.21162	18.5278
2	BC1G_11473	atp-dependent rna helicase dbp4	4.06914	16.7854
3	BC1G_13085		3.8772	14.6944
4	BC1G_02917		3.68356	12.8488
5	BC1G_03233		3.67682	12.7889
6	BC1G_01487	glycosyl transferase family 8 protein	3.67557	12.7778
7	BC1G_08853	amino acid permease	3.6325	12.402
8	BC1G_04369		3.60156	12.1389
9	BC1G_05840	p-loop containing nucleoside triphosphate hydrolase	3.52356	11.5
10	BC1G_03294	rna methylase family protein	3.52356	11.5
11	BC1G_10107	zn2 cys6 dna-binding protein	3.48417	11.1903
12	BC1G_15194		3.48417	11.1903
13	BC1G_06410	trna (uracil-5-)-methyltransferase	3.48417	11.1903
14	BC1G_07520		3.37726	10.391
15	BC1G_04981	atp-dependent rna helicase mak5	3.37726	10.391
16	BC1G_09367		3.37726	10.391
17	BC1G_00768		3.35364	10.2222
18	BC1G_05762		3.35364	10.2222
19	BC1G_15104		3.26178	9.59166
20	BC1G_08539		3.26178	9.59166
21	BC1G_09218	chloride channel 3	3.26053	9.58333
22	BC1G_10492	predicted protein	3.26053	9.58333
23	BC1G_14867		3.26053	9.58333
24	BC1G_05274		3.21162	9.26389
25	BC1G_02233	rna polymerase rpb3 insert domain-containing protein	3.21162	9.26389
26	BC1G_15560		3.16099	8.94444
27	BC1G_07150	cytochrome p450	3.13625	8.79236
28	BC1G_12667	trna methyltransferase	3.13625	8.79236
29	BC1G_11864		3.05408	8.30556
30	BC1G_01865		3.05408	8.30556
31	BC1G_14670	cdc45-like protein	3.05408	8.30556
32	BC1G_08848	c2h2 and c2hc zinc finger	3.0166	8.09259
33	BC1G_07668		2.99875	7.99305
34	BC1G_12448	wd domain protein	2.99875	7.99305
35	BC1G_12461	ydg sra domain-containing protein	2.99875	7.99305
36	BC1G_14696		2.99875	7.99305
37	BC1G_12454		2.99875	7.99305
38	BC1G_00472	carbamoyl-phosphate synthase arginine-specific large chain	2.99749	7.98611
39	BC1G_13545		2.9585	7.77315
40	BC1G_08368		2.9386	7.66667
41	BC1G_00851	kinesin motor domain-containing protein	2.9386	7.66667
42	BC1G_14464	atp-dependent rna helicase dbp9	2.90823	7.50694
43	BC1G_15942	pre-rrna-processing protein esf2	2.89796	7.4537
44	BC1G_00601	mfs transporter	2.85614	7.24074
45	BC1G_10584	c2h2 finger domain-containing protein	2.84674	7.19375
46	BC1G_07314		2.84674	7.19375
47	BC1G_11514	glycosyl hydrolase	2.84674	7.19375
48	BC1G_00551	leucyl-trna synthetase	2.84674	7.19375
49	BC1G_09040		2.84674	7.19375
50	BC1G_04339	purine and uridine phosphorylase	2.84674	7.19375
51	BC1G_00406	p-loop containing nucleoside triphosphate hydrolase	2.81307	7.02778
52	BC1G_08259		2.81307	7.02778
53	BC1G_12361		2.81307	7.02778
54	BC1G_05402		2.81307	7.02778
55	BC1G_04463		2.81307	7.02778
56	BC1G_02978		2.7799	6.86806
57	BC1G_02603	regulatory protein cys-3	2.7751	6.84524
58	BC1G_06310		2.76867	6.81481
59	BC1G_05002	rna binding effector protein scp160 protein	2.76867	6.81481
60	BC1G_07257		2.76303	6.78819
61	BC1G_00828	moz sas family protein	2.74595	6.70833
62	BC1G_09084		2.74156	6.68794
63	BC1G_15839	polyketide synthase	2.71119	6.54861
64	BC1G_14055	fatty acid synthase subunit alpha	2.70044	6.5
65	BC1G_11955		2.67682	6.39444
66	BC1G_11978		2.67682	6.39444
67	BC1G_06175	atp-grasp subdomain 1	2.67682	6.39444
68	BC1G_03716		2.67682	6.39444
69	BC1G_15043		2.67682	6.39444
70	BC1G_06698		2.67682	6.39444
71	BC1G_13320	rna polymerase i specific transcription initiation factor	2.67682	6.39444
72	BC1G_00385	homeobox domain-containing protein	2.67682	6.39444
73	BC1G_08079	dna-binding protein	2.67682	6.39444
74	BC1G_07406	p-loop containing nucleoside triphosphate hydrolase	2.67557	6.38889
75	BC1G_12757	isotrichodermin c-15 hydroxylase	2.67557	6.38889
76	BC1G_13369	hsp90-like protein	2.67557	6.38889
77	BC1G_16137	gmc oxidoreductase	2.67557	6.38889
78	BC1G_09345	chromo domain-containing protein	2.67557	6.38889
79	BC1G_15777		2.67557	6.38889
80	BC1G_12244		2.67557	6.38889
81	BC1G_06075	epl1-like protein	2.67557	6.38889
82	BC1G_02011	glycoside hydrolase family 26 protein	2.67557	6.38889
83	BC1G_08909		2.67557	6.38889
84	BC1G_14274	amino-acid permease	2.64642	6.26111
85	BC1G_10537	terpenoid synthase	2.62666	6.17593
86	BC1G_01130		2.60156	6.06944
87	BC1G_00937	pre-rrna processing protein	2.60156	6.06944
88	BC1G_12809	beta and beta-prime subunits of dna dependent rna-polymerase	2.60156	6.06944
89	BC1G_12101	calcium channel subunit cch1	2.60156	6.06944
90	BC1G_09723	nucleolar gtp-binding protein	2.59068	6.02381
91	BC1G_07170	pre-rrna processing protein tsr1	2.56309	5.90972
92	BC1G_12314	rna- rbd	2.56309	5.90972
93	BC1G_05178		2.52356	5.75
94	BC1G_04049		2.52356	5.75
95	BC1G_00528		2.52356	5.75
96	BC1G_00602	hypothetical protein BC1G_00602	2.52356	5.75
97	BC1G_14574		2.52356	5.75
98	BC1G_11025		2.52356	5.75
99	BC1G_15274		2.52356	5.75
100	BC1G_06755	pre-mrna processing splicing factor 8	2.52356	5.75
101	BC1G_08842		2.52356	5.75
102	BC1G_06482	intron-binding protein aquarius	2.52356	5.75
103	BC1G_16071		2.52356	5.75
104	BC1G_01198		2.52356	5.75
105	BC1G_04538		2.52356	5.75
106	BC1G_00850	kinesin family protein	2.52356	5.75
107	BC1G_16086	polyketide synthase	2.50048	5.65873
108	BC1G_03599		2.48417	5.59514
109	BC1G_09430		2.48417	5.59514
110	BC1G_10988		2.48417	5.59514
111	BC1G_10688	amidohydrolase family protein	2.48417	5.59514
112	BC1G_01128		2.48417	5.59514
113	BC1G_05698		2.48417	5.59514
114	BC1G_14359	hypothetical protein BofuT4_P078740.1	2.48417	5.59514
115	BC1G_12744		2.48417	5.59514
116	BC1G_08285	at hook domain-containing protein	2.48417	5.59514
117	BC1G_08139	ankyrin repeat protein	2.48417	5.59514
118	BC1G_10398		2.46911	5.53704
119	BC1G_13768	major facilitator superfamily transporter	2.4411	5.43056
120	BC1G_07499	aerobic respiration control sensor protein arcb	2.4411	5.43056
121	BC1G_10753		2.42689	5.37731
122	BC1G_12523	dead deah box helicase	2.42403	5.36667
123	BC1G_12929	alkanesulfonate monooxygenase	2.42403	5.36667
124	BC1G_16202		2.40583	5.29942
125	BC1G_10737	90s preribosome component rrp12	2.38926	5.23889
126	BC1G_03418		2.376	5.19097
127	BC1G_03272		2.35364	5.11111
128	BC1G_00970		2.35364	5.11111
129	BC1G_16229		2.35364	5.11111
130	BC1G_13069	dna repair protein	2.35364	5.11111
131	BC1G_08505		2.35364	5.11111
132	BC1G_01044		2.35364	5.11111
133	BC1G_11807	spherulin-1a	2.35364	5.11111
134	BC1G_00171		2.35364	5.11111
135	BC1G_12342		2.35364	5.11111
136	BC1G_12301	hypothetical protein BC1G_12301	2.35364	5.11111
137	BC1G_13316		2.35364	5.11111
138	BC1G_08808	transcription factor cys6	2.35364	5.11111
139	BC1G_06366		2.35364	5.11111
140	BC1G_01954		2.35364	5.11111
141	BC1G_05702		2.35364	5.11111
142	BC1G_04628	fungal specific transcription factor domain-containing protein	2.35364	5.11111
143	BC1G_05307		2.35364	5.11111
144	BC1G_01723	sodium calcium exchanger membrane region	2.35364	5.11111
145	BC1G_11350		2.35364	5.11111
146	BC1G_01255		2.35364	5.11111
147	BC1G_02174	gpr fun34 family protein	2.35364	5.11111
148	BC1G_01486	polysaccharide export protein	2.35364	5.11111
149	BC1G_10101		2.30783	4.95139
150	BC1G_12822	leucine carboxyl methyltransferase 2	2.30783	4.95139
151	BC1G_05418		2.29224	4.89815
152	BC1G_00871	nadph2:quinone reductase	2.26053	4.79167
153	BC1G_03942	domain-containing protein	2.26053	4.79167
154	BC1G_05424		2.26053	4.79167
155	BC1G_00665	mitochondrial membrane protein pet127 protein	2.26053	4.79167
156	BC1G_11519	ribosome biogenesis protein urb1	2.26053	4.79167
157	BC1G_12120	protein kinase	2.26053	4.79167
158	BC1G_02172		2.26053	4.79167
159	BC1G_00286	myb family transcription factor	2.26053	4.79167
160	BC1G_14626		2.25275	4.76591
161	BC1G_02761	wd40 repeat-like protein	2.23628	4.71181
162	BC1G_14220		2.22811	4.68519
163	BC1G_16390		2.21162	4.63194
164	BC1G_03746	p-loop containing nucleoside triphosphate hydrolase	2.20163	4.6
165	BC1G_09772	nitrate reductase	2.19158	4.56806
166	BC1G_03188	cellobiose dehydrogenase	2.17752	4.52375
167	BC1G_07915	glycine dehydrogenase	2.17599	4.51897
168	BC1G_10526	ubiquitin fusion degradation protein	2.1718	4.50585
169	BC1G_04736	c2h2 transcription factor	2.16099	4.47222
170	BC1G_16283	vesicular-fusion protein sec18	2.16099	4.47222
171	BC1G_04089		2.16099	4.47222
172	BC1G_01598	ran bp2 nzf zinc finger-like protein	2.16099	4.47222
173	BC1G_15087		2.16099	4.47222
174	BC1G_07022		2.16099	4.47222
175	BC1G_13182		2.16099	4.47222
176	BC1G_08159		2.16099	4.47222
177	BC1G_15789	dna mismatch repair protein	2.16099	4.47222
178	BC1G_06602	gtpase activating protein	2.16099	4.47222
179	BC1G_09116	amino-acid permease	2.16099	4.47222
180	BC1G_09098		2.16099	4.47222
181	BC1G_13323	pescadillo	2.16099	4.47222
182	BC1G_07133		2.16099	4.47222
183	BC1G_04626	acyl- n-acyltransferases	2.16099	4.47222
184	BC1G_02919		2.16099	4.47222
185	BC1G_11351		2.16099	4.47222
186	BC1G_14774		2.16099	4.47222
187	BC1G_03875	hypothetical protein BcDW1_40	2.16099	4.47222
188	BC1G_06537	v-type proton atpase proteolipid subunit	2.16099	4.47222
189	BC1G_02508	cysteine proteinase	2.13791	4.40123
190	BC1G_00196	valyl-trna synthetase	2.10852	4.3125
191	BC1G_10070		2.10852	4.3125
192	BC1G_03338	heat shock protein 78 protein	2.1062	4.30556
193	BC1G_15526	cytochrome p450 monooxygenase	2.09472	4.27143
194	BC1G_15838	acyl transferase acyl hydrolase lysophospholipase	2.08328	4.23769
195	BC1G_08850	flavin-binding monooxygenase-like protein	2.08156	4.23264
196	BC1G_03673	dynactin p62 family protein	2.0761	4.21667
197	BC1G_12340		2.0761	4.21667
198	BC1G_02660		2.0761	4.21667
199	BC1G_16120		2.06804	4.19317
200	BC1G_03187		2.05408	4.15278
201	BC1G_16013		2.05408	4.15278
202	BC1G_04972	kinesin family protein	2.05408	4.15278
203	BC1G_15433	rrna-processing protein utp23	2.05408	4.15278
204	BC1G_12790		2.05408	4.15278
205	BC1G_00212	g-patch rna maturation protein	2.05408	4.15278
206	BC1G_00896		2.03546	4.09954
207	BC1G_15506	elongation factor 3	2.03546	4.09954
208	BC1G_09636	intermediate filament protein	2.03171	4.08889
209	BC1G_09777	dna polymerase v family protein	2.03171	4.08889
210	BC1G_13029	multiple rna-binding domain-containing protein 1	2.0166	4.0463
211	BC1G_04150		2.0166	4.0463
212	BC1G_01292	elongation factor g 2	2.0166	4.0463
